# Supplementary material for: Remote Sensing Data for Geological Mapping in the Saka Region in Northeast Morocco: An Integrated Approach
Source: MDPI journal article supplement (doi:10.3390/su142215349), 2022-11-18
Supplement: s1 [file s1]

**Table S1.** Summary of selected satellite sensors.

| Sensor mission    | Organization                | Operation period | Band    | Spatial resolution (m) | Swath (km) | Spectral coverage (um) | Number of channels | Ref.  |
|-------------------|-----------------------------|------------------|---------|------------------------|------------|------------------------|--------------------|-------|
| Landsat Oli-8     | NASA and USGS collaboration | 2013             | 1       | 30 (Coastal aerosol)   |            | 0.43 – 0.45            | 11                 | [1,2] |
|                   |                             |                  | 2 ;3 ;4 | 30 (Visible)           |            | 0.45 – 0.67            |                    |       |
|                   |                             |                  | 5       | 30 (NIR)               |            | 0.85 – 0.88            |                    |       |
|                   |                             |                  | 6       | 30 (SWIR-1)            |            | 1.57 – 1.65            |                    |       |
|                   |                             |                  | 7       | 30 (SWIR-2)            |            | 2.11 – 2.29            |                    |       |
|                   |                             |                  | 8       | 15                     |            | 0.50 - 0.68            |                    |       |
|                   |                             |                  | 9       | (Panchromatic)         | 185        | 1.36 - 1.38            |                    |       |
|                   |                             |                  | 10      | (Cirrus)               |            | 10.60 – 11.19          |                    |       |
|                   |                             |                  | 11      | 100 (TIR-1)            |            | 11.50 – 12.51          |                    |       |
|                   |                             |                  |         | 100 (TIR-2)            |            |                        |                    |       |
| ASTER (EOS Terra) | NASA and MITI USA           | 1999             |         | 15 (VNIR)              |            | 0.52 – 0.86,           | 14                 | [3,4] |
|                   |                             |                  |         | 30 (SWIR)              | 60         | 1.60 – 2.43,           |                    |       |
|                   |                             |                  |         | 90 (TIR)               |            | 8.125–11.65            |                    |       |

**Table S2.** Details of the most color composite used in geology.

| Colore Composite (R-G-B) | Interest                                      | Imagery   | Reference |
|--------------------------|-----------------------------------------------|-----------|-----------|
| 4-3-2                    | natural colour                                | Landsat 8 | [5]       |
| 2-5-7 and 6-5-7          | iron oxides and clay minerals                 | Landsat 8 | [6]       |
| 10-11-7                  | silicate detection                            | Landsat 8 | [6]       |
| 5-7-3                    | Hydrothermally altered rocks                  | Landsat 8 | [7]       |
| 7-6-4 and 5-6-7          | Rock discrimination of alteration             | Landsat 8 | [8]       |
| 3-2-7                    | Li-bearing minerals                           | Landsat 8 | [7]       |
| 2-3-11                   |                                               |           |           |
| 7-3-11                   |                                               |           |           |
| 6-2-1                    | gossan areas, alteration zones and host rocks | ASTER     | [7]       |
| 6-3-1                    | Enhance hydrothermal gossans                  | ASTER     | [7]       |
| 7-4-2                    | identify and enhance geological structures    | ASTER     | [7]       |

**Table S3.** Details band ratios usefulness in geological studies.

| <b>Ratio and Band Ratio (R-G-B)</b> | <b>Useful</b>                                                       | <b>Imagery</b> | <b>reference</b> |
|-------------------------------------|---------------------------------------------------------------------|----------------|------------------|
| 4/2 or 4/3                          | Iron oxides                                                         | Landsat 8      | [7]              |
| 7/6                                 | clay minerals mapping<br>(kaolinite, illite and<br>montmorillonite) | Landsat 8      | [8]              |
| 7/6                                 | Muscovite                                                           | ASTER          | [7]              |
| 3/5                                 | discriminate Li-                                                    | Landsat 8      | [7]              |
| 2/4                                 | mineralizations                                                     | ASTER          |                  |
| 6/5                                 | sandstone–mudstone<br>mapping                                       | Landsat 8      | [4]              |
| 5/3                                 |                                                                     | ASTER          |                  |
| 5/4                                 | discriminate alluvium                                               | Landsat 8      | [4]              |
| 3/2                                 |                                                                     | ASTER          |                  |
| 4/7                                 | Rock unit mapping                                                   | Landsat 8      | [4]              |
| 3/6                                 |                                                                     | ASTER          |                  |
| 9/4                                 | Discrimination rhyolitic<br>ignimbrite                              | ASTER          | [4]              |
| 4/2 - 6/7 - 5                       | Identification of lithology<br>and altered rocks                    | Landsat 8      | [8]              |
| 4/2 - 6/7 - band 10                 | lithological mapping                                                | Landsat 8      | [6]              |
| 4/2 - 6/5 - band 6/7                | hydrothermal alteration area<br>mapping                             | Landsat 8      | [6]              |
| 6/7 - 6/5 - 4/2                     | clay and carbonate minerals<br>mapping                              | Landsat 8      | [9]              |

**Table S4.** Accuracy assessment for SAM for SAM classification of ASTER image.

|                             | Quaternary<br>basalt | Trachy-<br>Andesite | Water | Vegetation | Miocene | Jurassic | Old<br>quaternary | Recent<br>Quaternary | Eociene<br>and<br>oligocene | User<br>Accuracy |
|-----------------------------|----------------------|---------------------|-------|------------|---------|----------|-------------------|----------------------|-----------------------------|------------------|
| Quaternary<br>basalt        | 298                  | 2                   | 1     | 23         | 2       | 0        | 1                 | 0                    | 0                           | 91.13            |
| Trachy-<br>Andesite         | 1                    | 267                 | 13    | 8          | 2       | 1        | 3                 | 8                    | 2                           | 87.54            |
| Water                       | 0                    | 35                  | 345   | 3          | 19      | 2        | 0                 | 0                    | 8                           | 83.73            |
| Vegetation                  | 8                    | 0                   | 2     | 192        | 0       | 0        | 2                 | 2                    | 4                           | 93.2             |
| Miocene                     | 1                    | 6                   | 0     | 0          | 78      | 7        | 5                 | 4                    | 2                           | 75.72            |
| Jurassic                    | 2                    | 0                   | 0     | 0          | 1       | 62       | 2                 | 3                    | 9                           | 78.48            |
| Old<br>quaternary           | 5                    | 0                   | 0     | 0          | 0       | 0        | 58                | 6                    | 11                          | 72.5             |
| Recent<br>Quaternary        | 6                    | 1                   | 2     | 7          | 6       | 3        | 7                 | 205                  | 9                           | 83.33            |
| Eociene<br>and<br>oligocene | 2                    | 7                   | 0     | 3          | 5       | 18       | 13                | 26                   | 94                          | 55.95            |
| Producer<br>Accuracy        | 92.26                | 83.96               | 95.04 | 81.355     | 69.02   | 66.66    | 63.73             | 80.70                | 67.62                       | OA=0.83          |

**Table S4.** Accuracy assessment for SAM for SAM classification of Landsat 8-OLI image.

|                             | Quaternary<br>basalt | Trachy-<br>Andesite | Water | Vegetation | Miocene | Jurassic | Old<br>quaternary | Recent<br>Quaternary | Eociene<br>and<br>oligocene | User<br>Accuracy |
|-----------------------------|----------------------|---------------------|-------|------------|---------|----------|-------------------|----------------------|-----------------------------|------------------|
| Quaternary<br>basalt        | 121                  | 8                   | 3     | 14         | 0       | 7        | 5                 | 31                   | 3                           | 63.02            |
| Trachy-<br>Andesite         | 1                    | 237                 | 17    | 4          | 0       | 9        | 0                 | 30                   | 5                           | 78.21            |
| Water                       | 3                    | 25                  | 119   | 3          | 9       | 2        | 10                | 0                    | 8                           | 66.48            |
| Vegetation                  | 11                   | 0                   | 2     | 142        | 0       | 0        | 11                | 12                   | 14                          | 79.77            |
| Miocene                     | 1                    | 0                   | 0     | 0          | 89      | 3        | 16                | 8                    | 0                           | 76.06            |
| Jurassic                    | 0                    | 0                   | 21    | 4          | 3       | 123      | 8                 | 2                    | 16                          | 69.491           |
| Old<br>quaternary           | 7                    | 0                   | 0     | 0          | 0       | 10       | 76                | 0                    | 41                          | 56.71            |
| Recent<br>Quaternary        | 9                    | 1                   | 2     | 2          | 9       | 10       | 0                 | 185                  | 9                           | 59.03            |
| Eociene<br>and<br>oligocene | 2                    | 8                   | 0     | 13         | 5       | 11       | 9                 | 5                    | 134                         | 71.65            |
| Producer<br>Accuracy        | 78.064               | 84.94               | 72.56 | 78.021     | 77.39   | 70.28    | 56.29             | 67.76                | 58.26                       | OA=0.72          |

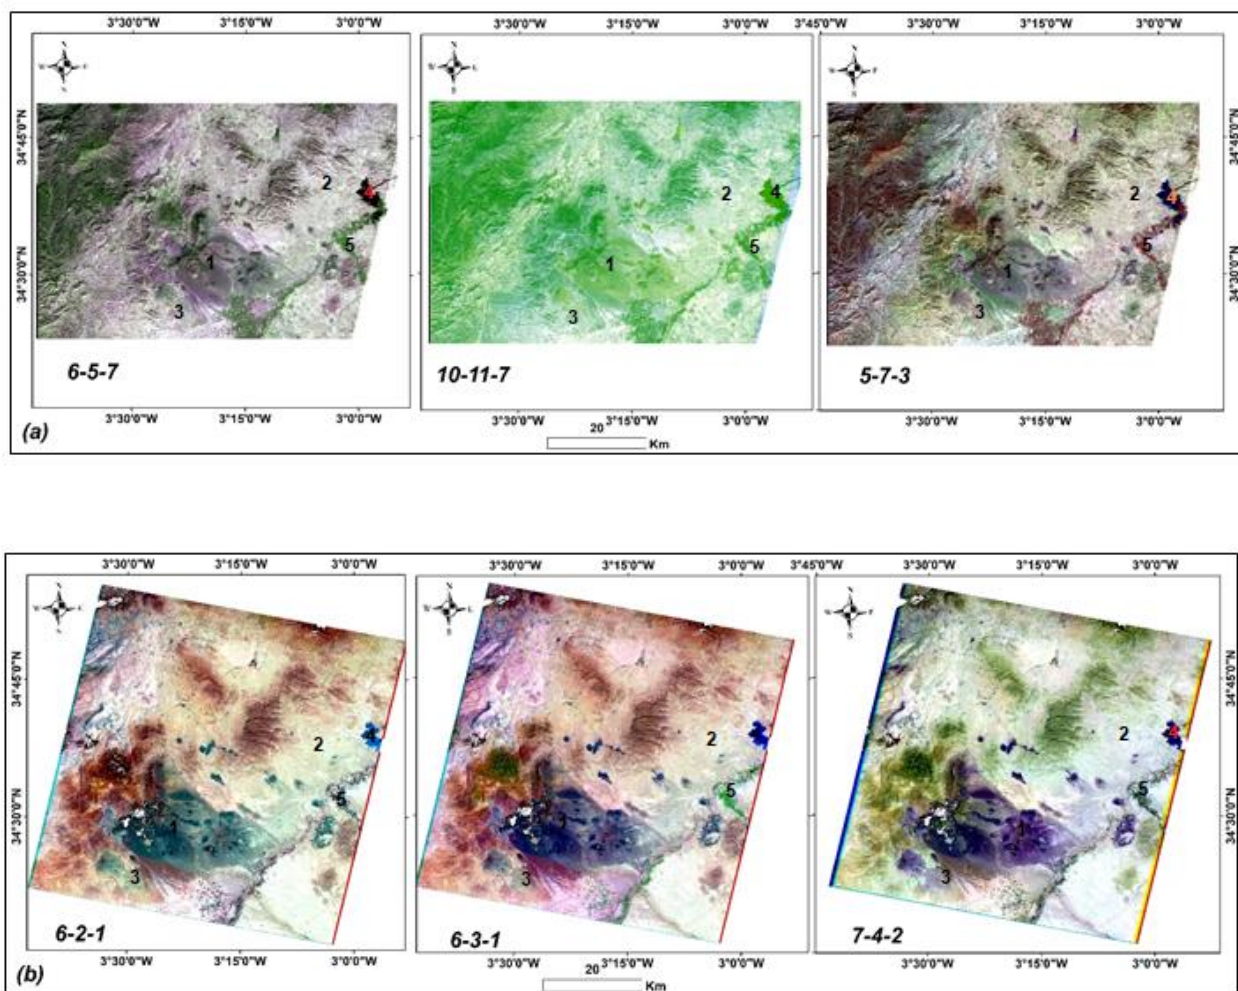

Figure S1. False color composite (a. Landsat oli-8 and b. ASTER).

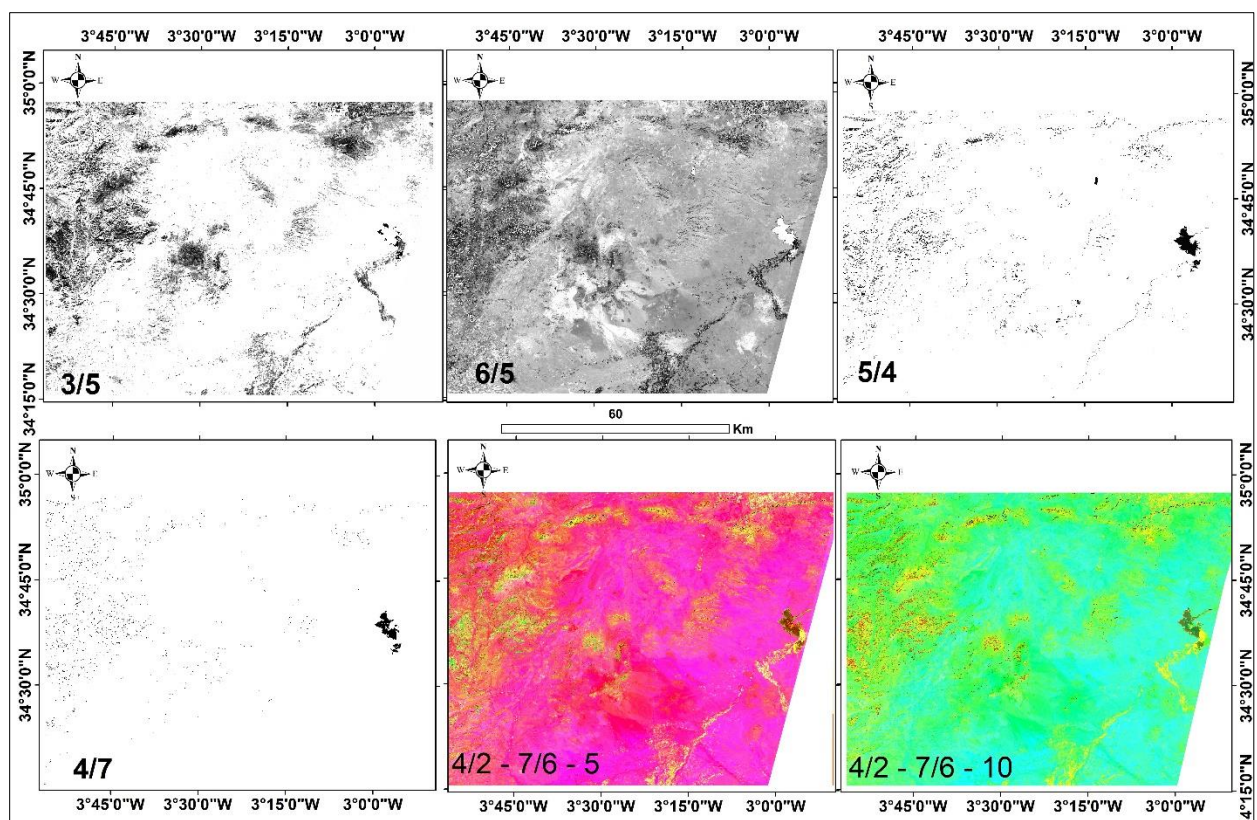

Figure S2. Landsat 8 Oli bands ration used in geology.

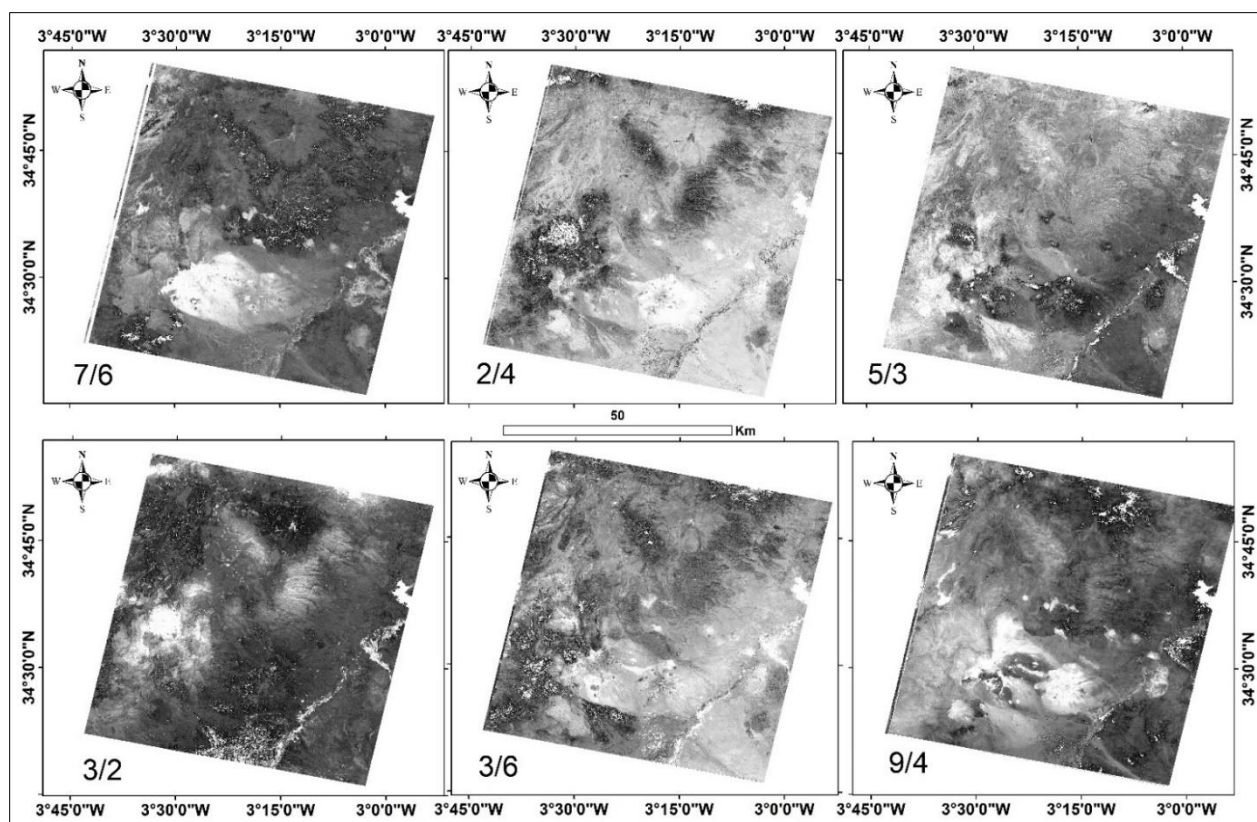

**Figure S3.** ASTER bands ration used in geology.

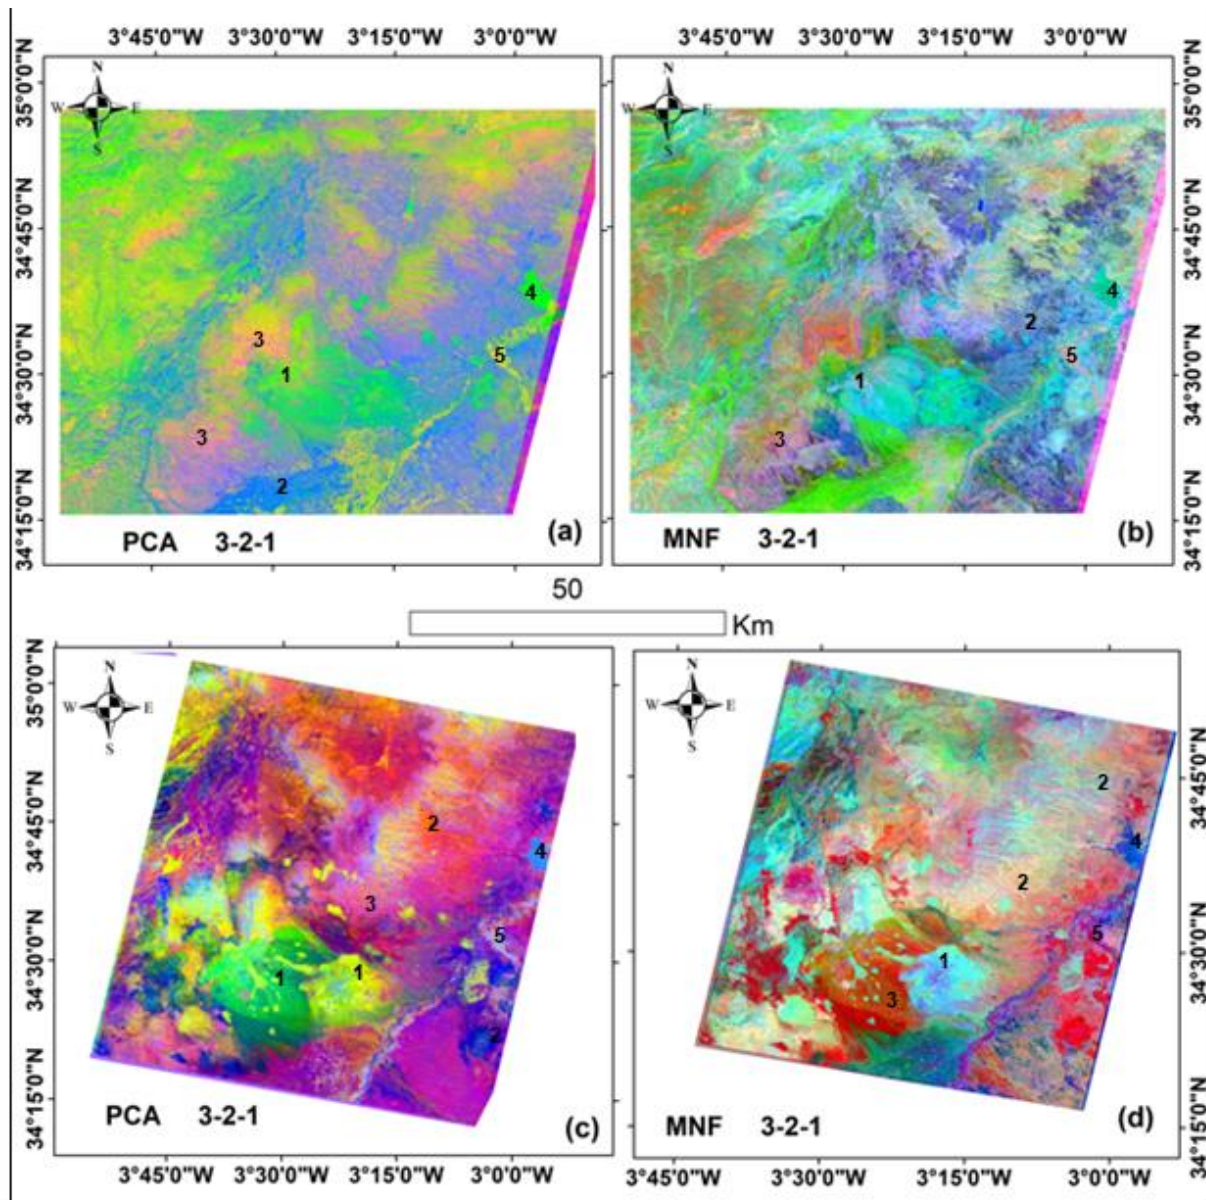

**Figure S4.** PCA Composite bands 3, 2, 1 (a. Landsat 8 Oli and c. ASTER) and MNF Composite bands 3, 2, 1 (b. Landsat 8 Oli and d. ASTER).

## References

1. Korhonen, L.; Packalen, P.; Rautiainen, M. Comparison of Sentinel-2 and Landsat 8 in the Estimation of Boreal Forest Canopy Cover and Leaf Area Index. *Remote Sens. Environ.* **2017**, *195*, 259–274.
2. Roy, D.P.; Wulder, M.A.; Loveland, T.R.; Woodcock, C.E.; Allen, R.G.; Anderson, M.C.; Helder, D.; Irons, J.R.; Johnson, D.M.; Kennedy, R. Landsat-8: Science and Product Vision for Terrestrial Global Change Research. *Remote Sens. Environ.* **2014**, *145*, 154–172.
3. Rogan, J.; Chen, D. Remote Sensing Technology for Mapping and Monitoring Land-Cover and Land-Use Change. *Prog. Plan.* **2004**, *61*, 301–325.

4. Adiri, Z.; El Harti, A.; Jellouli, A.; Maacha, L.; Bachaoui, E.M. Lithological Mapping Using Landsat 8 OLI and Terra ASTER Multispectral Data in the Bas Drâa Inlier, Moroccan Anti Atlas. *J. Appl. Remote Sens.* **2016**, *10*, 016005.
5. Abdulmalik, N.; Garba, I.; Abubakar, I.Y.; Muhyideen, H.; Agunleti, Y.S.; Magaji, S.S.; Aliyu, A.E.; Umaru, A.O. APPLICATION OF LANDSAT-8 OPERATIONAL LAND IMAGER AND SHUTTLE RADAR TOPOGRAPHY MISSION-DIGITAL ELEVATION MODEL IN THE STUDY OF IKARA AND ITS ENVIRONS, NORTHWESTERN NIGERIA. *FUDMA J. Sci.* **2021**, *5*, 259–273.
6. Ali, A.S.; Pour, A.B. Lithological Mapping and Hydrothermal Alteration Using Landsat 8 Data: A Case Study in Ariab Mining District, Red Sea Hills, Sudan. *Int. J. Basic Appl. Sci.* **2014**, *3*, 199.
7. Cardoso-Fernandes, J.; Teodoro, A.C.; Lima, A. Remote Sensing Data in Lithium (Li) Exploration: A New Approach for the Detection of Li-Bearing Pegmatites. *Int. J. Appl. Earth Obs. Geoinformation* **2019**, *76*, 10–25.
8. Banerjee, K.; Jain, M.K.; Panda, S.; Jeyaseelan, A.T. Landsat 8 OLI Data for Identification of Hydrothermal Alteration Zone in Singhbhum Shear Zone Using Successive Band Depth Difference Technique-a New Image Processing Approach. *Curr. Sci.* **00113891** **2019**, 116.
9. Traore, M.; Wambo, J.D.T.; Ndepete, C.P.; Tekin, S.; Pour, A.B.; Muslim, A.M. Lithological and Alteration Mineral Mapping for Alluvial Gold Exploration in the South East of Birao Area, Central African Republic Using Landsat-8 Operational Land Imager (OLI) Data. *J. Afr. Earth Sci.* **2020**, *170*, 103933.
